# Supplementary material for: Analysis of Mycotoxin and Secondary Metabolites in Commercial and Traditional Slovak Cheese Samples
Source: MDPI journal article supplement (doi:10.3390/toxins14020134), 2022-02-10
Supplement: s1 [file s1]

# Analysis of Mycotoxin and Secondary Metabolites in Commercial and Traditional Slovak Cheese Samples

Luana Izzo, Petra Mikušová, Sonia Lombardi, Michael Sulyok and Alberto Ritieni

**Table S1.** Occurrence of 13 target compounds in Slovak cheese samples ( $n = 68$ ). Results are expressed as  $\mu\text{g/kg}$  samples.

| Sample                             | 3-NPA* | Andrastin A | Andrastin B | Andrastin C | Andrastin D | Chanoclavine | Enniatin B | Festoclavine | iso-Fumigaclavine | Mycophenolic acid | Roquefortine C | Roquefortine D | Tryptophol |
|------------------------------------|--------|-------------|-------------|-------------|-------------|--------------|------------|--------------|-------------------|-------------------|----------------|----------------|------------|
| $\mu\text{g/kg}$                   |        |             |             |             |             |              |            |              |                   |                   |                |                |            |
| <i>Traditional Slovak cheeses:</i> |        |             |             |             |             |              |            |              |                   |                   |                |                |            |
| 1                                  | <LOD   | <LOD        | <LOD        | <LOD        | <LOD        | <LOD         | 0.51       | <LOD         | <LOD              | <LOD              | <LOD           | <LOD           | 41.2       |
| 2                                  | <LOD   | <LOD        | <LOD        | <LOD        | <LOD        | <LOD         | 0.36       | <LOD         | <LOD              | <LOD              | <LOD           | <LOD           | <LOQ       |
| 3                                  | <LOD   | <LOD        | <LOD        | <LOD        | <LOD        | <LOD         | 0.22       | <LOD         | <LOD              | <LOD              | <LOD           | <LOD           | 7930       |
| 4                                  | 66.7   | 8890        | 3610        | 3150        | 115.7       | 3.1          | 0.39       | 1.2          | 178               | 29.4              | 8055           | 591.8          | <LOQ       |
| 5                                  | <LOD   | <LOD        | <LOD        | <LOD        | <LOD        | <LOD         | 0.71       | <LOD         | <LOD              | <LOD              | <LOD           | <LOD           | 162.7      |
| 6                                  | 10.6   | 7510        | 2750        | 3570        | 89.7        | 7.5          | 0.26       | 2            | 294               | 20.7              | 17900          | 924            | 298.5      |
| 7                                  | <LOD   | <LOD        | <LOD        | <LOD        | <LOD        | <LOD         | 0.45       | <LOD         | <LOD              | <LOD              | <LOD           | <LOD           | <LOD       |
| 8                                  | <LOD   | <LOD        | <LOD        | <LOD        | <LOD        | <LOD         | 0.07       | <LOD         | <LOD              | <LOD              | <LOD           | <LOD           | <LOD       |
| 9                                  | <LOD   | <LOD        | <LOD        | <LOD        | <LOD        | <LOD         | 0.10       | <LOD         | <LOD              | <LOD              | <LOD           | <LOD           | <LOD       |
| 10                                 | <LOD   | <LOD        | <LOD        | <LOD        | <LOD        | <LOD         | 0.06       | <LOD         | <LOD              | <LOD              | <LOD           | <LOD           | <LOD       |
| 11                                 | <LOD   | <LOD        | <LOD        | <LOD        | <LOD        | <LOD         | 0.04       | <LOD         | <LOD              | <LOD              | <LOD           | <LOD           | <LOD       |
| 12                                 | <LOD   | <LOD        | <LOD        | <LOD        | <LOD        | <LOD         | 0.04       | <LOD         | <LOD              | <LOD              | <LOD           | <LOD           | <LOD       |
| 13                                 | <LOD   | <LOD        | <LOD        | <LOD        | <LOD        | <LOD         | 0.16       | <LOD         | <LOD              | <LOD              | <LOD           | <LOD           | 13.4       |
| 14                                 | <LOD   | <LOD        | <LOD        | <LOD        | <LOD        | <LOD         | 0.11       | <LOD         | <LOD              | <LOD              | <LOD           | <LOD           | <LOD       |
| 15                                 | <LOD   | <LOD        | <LOD        | <LOD        | <LOD        | <LOD         | 0.04       | <LOD         | <LOD              | <LOD              | <LOD           | <LOD           | <LOD       |
| 16                                 | <LOD   | <LOD        | <LOD        | <LOD        | <LOD        | <LOD         | 0.69       | <LOD         | <LOD              | <LOD              | <LOD           | <LOD           | 241.1      |
| 17                                 | <LOD   | <LOD        | <LOD        | <LOD        | <LOD        | <LOD         | 0.22       | <LOD         | <LOD              | <LOD              | <LOD           | <LOD           | 374.1      |
| 18                                 | <LOD   | <LOD        | <LOD        | <LOD        | <LOD        | <LOD         | 0.07       | <LOD         | <LOD              | <LOD              | <LOD           | <LOD           | 15.00      |
| 19                                 | <LOD   | <LOD        | <LOD        | <LOD        | <LOD        | <LOD         | 0.17       | <LOD         | <LOD              | <LOD              | <LOD           | <LOD           | 30.7       |
| 20                                 | <LOD   | <LOD        | <LOD        | <LOD        | <LOD        | <LOD         | 0.29       | <LOD         | <LOD              | <LOD              | <LOD           | <LOD           | <LOD       |
| 21                                 | <LOD   | <LOD        | <LOD        | <LOD        | <LOD        | <LOD         | 0.11       | <LOD         | <LOD              | <LOD              | <LOD           | <LOD           | <LOD       |
| 22                                 | <LOD   | <LOD        | <LOD        | <LOD        | <LOD        | <LOD         | 0.04       | <LOD         | <LOD              | <LOD              | <LOD           | <LOD           | <LOD       |
| 23                                 | <LOD   | <LOD        | <LOD        | <LOD        | <LOD        | <LOD         | 0.17       | <LOD         | <LOD              | <LOD              | <LOD           | <LOD           | <LOD       |
| 24                                 | <LOD   | <LOD        | <LOD        | <LOD        | <LOD        | <LOD         | 0.06       | <LOD         | <LOD              | <LOD              | <LOD           | <LOD           | <LOD       |
| 25                                 | <LOD   | <LOD        | <LOD        | <LOD        | <LOD        | <LOD         | 0.12       | <LOD         | <LOD              | <LOD              | <LOD           | <LOD           | <LOD       |

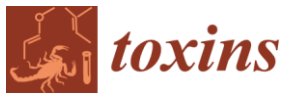

|                            |      |      |      |        |       |      |      |      |        |       |       |       |       |
|----------------------------|------|------|------|--------|-------|------|------|------|--------|-------|-------|-------|-------|
| 26                         | <LOD | <LOD | <LOD | <LOD   | <LOD  | <LOD | 0.29 | <LOD | <LOD   | <LOD  | <LOD  | <LOD  | 52.6  |
| 27                         | <LOD | <LOD | <LOD | <LOD   | <LOD  | <LOD | 0.31 | <LOD | <LOD   | <LOD  | <LOD  | <LOD  | <LOD  |
| 28                         | <LOD | <LOD | <LOD | <LOD   | <LOD  | <LOD | 0.08 | <LOD | <LOD   | <LOD  | <LOD  | <LOD  | <LOD  |
| 29                         | <LOD | <LOD | <LOD | <LOD   | <LOD  | <LOD | 0.09 | <LOD | <LOD   | <LOD  | <LOD  | <LOD  | <LOD  |
| Commercial Slovak cheeses: |      |      |      |        |       |      |      |      |        |       |       |       |       |
| 30                         | 16.9 | 9140 | 1954 | 1579.5 | 152.3 | 6.9  | 0.53 | 0.21 | 90     | 16.2  | 13700 | 901.7 | <LOD  |
| 31                         | 3.8  | <LOD | <LOD | <LOD   | <LOD  | <LOD | 0.34 | <LOD | <LOD   | <LOD  | <LOD  | <LOD  | 171   |
| 32                         | <LOD | <LOD | <LOD | <LOD   | <LOD  | <LOD | 0.11 | <LOD | <LOD   | <LOD  | <LOD  | <LOD  | 138.6 |
| 33                         | <LOD | <LOD | <LOD | <LOD   | <LOD  | <LOD | 0.23 | <LOD | <LOD   | <LOD  | <LOD  | <LOD  | <LOQ  |
| 34                         | <LOD | <LOD | <LOD | <LOD   | <LOD  | <LOD | 0.13 | <LOD | <LOD   | <LOD  | <LOD  | <LOD  | 19.5  |
| 35                         | <LOD | <LOD | <LOD | <LOD   | <LOD  | <LOD | 0.18 | <LOD | <LOD   | <LOD  | <LOD  | <LOD  | 17.4  |
| 36                         | <LOD | <LOD | <LOD | <LOD   | <LOD  | <LOD | 0.07 | <LOD | <LOD   | <LOD  | <LOD  | <LOD  | <LOD  |
| 37                         | 27.2 | 4782 | 2448 | 3083   | 96.2  | 4.9  | 0.57 | 1.3  | 135.41 | 28.69 | 11853 | 679   | <LOD  |
| 38                         | <LOD | <LOD | <LOD | <LOD   | <LOD  | <LOD | 0.05 | <LOD | <LOD   | <LOD  | <LOD  | <LOD  | <LOD  |
| 39                         | <LOD | <LOD | <LOD | <LOD   | <LOD  | <LOD | 0.07 | <LOD | <LOD   | <LOD  | <LOD  | <LOD  | <LOD  |
| 40                         | <LOD | <LOD | <LOD | <LOD   | <LOD  | <LOD | 0.17 | <LOD | <LOD   | <LOD  | <LOD  | <LOD  | <LOD  |
| 41                         | <LOD | <LOD | <LOD | <LOD   | <LOD  | <LOD | 0.26 | <LOD | <LOD   | <LOD  | <LOD  | <LOD  | <LOD  |
| 42                         | <LOD | <LOD | <LOD | <LOD   | <LOD  | <LOD | 0.02 | <LOD | <LOD   | <LOD  | <LOD  | <LOD  | <LOD  |
| 43                         | <LOD | <LOD | <LOD | <LOD   | <LOD  | <LOD | 0.09 | <LOD | <LOD   | <LOD  | <LOD  | <LOD  | 304.5 |
| 44                         | <LOD | <LOD | <LOD | <LOD   | <LOD  | <LOD | 0.08 | <LOD | <LOD   | <LOD  | <LOD  | <LOD  | 266.5 |
| 45                         | <LOD | <LOD | <LOD | <LOD   | <LOD  | <LOD | 0.29 | <LOD | <LOD   | <LOD  | <LOD  | <LOD  | 17.3  |
| 46                         | <LOD | <LOD | <LOD | <LOD   | <LOD  | <LOD | 0.08 | <LOD | <LOD   | <LOD  | <LOD  | <LOD  | 15.5  |
| 47                         | <LOD | <LOD | <LOD | <LOD   | <LOD  | <LOD | 0.04 | <LOD | <LOD   | <LOD  | <LOD  | <LOD  | 99.2  |
| 48                         | <LOD | <LOD | <LOD | <LOD   | <LOD  | <LOD | 0.11 | <LOD | <LOD   | <LOD  | <LOD  | <LOD  | <LOD  |
| 49                         | <LOD | <LOD | <LOD | <LOD   | <LOD  | <LOD | 0.19 | <LOD | <LOD   | <LOD  | <LOD  | <LOD  | <LOD  |
| 50                         | <LOD | <LOD | <LOD | <LOD   | <LOD  | <LOD | 0.16 | <LOD | <LOD   | <LOD  | <LOD  | <LOD  | <LOD  |
| 51                         | <LOD | <LOD | <LOD | <LOD   | <LOD  | <LOD | 0.17 | <LOD | <LOD   | <LOD  | <LOD  | <LOD  | <LOD  |
| 52                         | <LOD | <LOD | <LOD | <LOD   | <LOD  | <LOD | 0.17 | <LOD | <LOD   | <LOD  | <LOD  | <LOD  | <LOQ  |
| 53                         | <LOD | <LOD | <LOD | <LOD   | <LOD  | <LOD | 0.06 | <LOD | <LOD   | <LOD  | <LOD  | <LOD  | 151   |
| 54                         | <LOD | <LOD | <LOD | <LOD   | <LOD  | <LOD | 0.26 | <LOD | <LOD   | <LOD  | <LOD  | <LOD  | 353.7 |
| 55                         | <LOD | <LOD | <LOD | <LOD   | <LOD  | <LOD | 0.05 | <LOD | <LOD   | <LOD  | <LOD  | <LOD  | <LOD  |
| 56                         | <LOD | <LOD | <LOD | <LOD   | <LOD  | <LOD | 0.10 | <LOD | <LOD   | <LOD  | <LOD  | <LOD  | <LOD  |
| 57                         | <LOD | <LOD | <LOD | <LOD   | <LOD  | <LOD | 0.08 | <LOD | <LOD   | <LOD  | <LOD  | <LOD  | <LOD  |
| 58                         | <LOD | <LOD | <LOD | <LOD   | <LOD  | <LOD | 0.24 | <LOD | <LOD   | <LOD  | <LOD  | <LOD  | <LOD  |
| 59                         | <LOD | <LOD | <LOD | <LOD   | <LOD  | <LOD | 0.07 | <LOD | <LOD   | <LOD  | <LOD  | <LOD  | <LOD  |
| 60                         | <LOD | <LOD | <LOD | <LOD   | <LOD  | <LOD | 0.10 | <LOD | <LOD   | <LOD  | <LOD  | <LOD  | <LOQ  |
| 61                         | <LOD | <LOD | <LOD | <LOD   | <LOD  | <LOD | 0.10 | <LOD | <LOD   | <LOD  | <LOD  | <LOD  | <LOQ  |
| 62                         | <LOD | <LOD | <LOD | <LOD   | <LOD  | <LOD | 0.10 | <LOD | <LOD   | <LOD  | <LOD  | <LOD  | 72.32 |
| 63                         | <LOD | <LOD | <LOD | <LOD   | <LOD  | <LOD | 0.20 | <LOD | <LOD   | <LOD  | <LOD  | <LOD  | <LOD  |

|             |      |      |      |      |      |      |      |      |      |      |      |      |       |
|-------------|------|------|------|------|------|------|------|------|------|------|------|------|-------|
| 64          | <LOD | <LOD | <LOD | <LOD | <LOD | <LOD | 0.07 | <LOD | <LOD | <LOD | <LOD | <LOD | <LOD  |
| 65          | <LOD | <LOD | <LOD | <LOD | <LOD | <LOD | 0.17 | <LOD | <LOD | <LOD | <LOD | <LOD | <LOD  |
| 66          | <LOD | <LOD | <LOD | <LOD | <LOD | <LOD | 0.11 | <LOD | <LOD | <LOD | <LOD | <LOD | <LOD  |
| 67          | <LOD | <LOD | <LOD | <LOD | <LOD | <LOD | 0.09 | <LOD | <LOD | <LOD | <LOD | <LOD | <LOD  |
| 68          | <LOD | <LOD | <LOD | <LOD | <LOD | <LOD | 0.13 | <LOD | <LOD | <LOD | <LOD | <LOD | <LOD  |
| LOD (µg/kg) | 0.74 | 0.25 | 0.87 | 0.25 | 0.25 | 0.18 | 0.01 | 0.03 | 0.12 | 1.16 | 0.47 | 0.54 | 3.52  |
| LOQ (µg/kg) | 2.71 | 0.83 | 2.91 | 0.83 | 0.83 | 0.61 | 0.04 | 0.10 | 0.41 | 3.88 | 1.56 | 1.81 | 11.70 |

\*3-Nitropropionic acid

**Table S2.** Characteristics of the 68 analyzed samples, original traditional Slovak cheeses came from markets and local farmers using a traditional biotechnical process at manufacture ( $n = 29$ ) and common commercial Slovak cheeses came from markets ( $n = 39$ ).

| Sample ID                          | Type of Cheese                                     | Commercial Name/Origin of Cheese |
|------------------------------------|----------------------------------------------------|----------------------------------|
| <i>Traditional Slovak cheeses:</i> |                                                    |                                  |
| 1                                  | Camembert (P. Candidum)/ Cow's Cheese <sup>1</sup> | -                                |
| 2                                  | Camembert (P. Candidum)/ Cow's Cheese <sup>2</sup> | -                                |
| 3                                  | Camembert (P. Candidum)/ Cow's Cheese <sup>3</sup> | -                                |
| 4                                  | Camembert (P. Candidum)/ Cow's Cheese              | -                                |
| 5                                  | Camembert (P. Candidum)/ Cow's Cheese              | -                                |
| 6                                  | Niva (P. Roquefortii) / Cow's Cheese               | -                                |
| 7                                  | Niva (P. Roquefortii) / Cow's Cheese               | -                                |
| 8                                  | Niva (P. Roquefortii) / Cow's Cheese               | -                                |
| 9                                  | Niva (P. Roquefortii) / Cow's Cheese               | -                                |
| 10                                 | Bryndza/ Sheep cheese                              | -                                |
| 11                                 | Bryndza/ Sheep cheese                              | -                                |
| 12                                 | Bryndza/ Sheep cheese                              | -                                |
| 13                                 | Bryndza/ Sheep cheese                              | -                                |
| 14                                 | Bryndza/ Sheep cheese                              | -                                |
| 15                                 | Bryndza/ Sheep cheese                              | -                                |
| 16                                 | Parenica/ Cow's Cheese                             | -                                |
| 17                                 | Parenica/ Cow's Cheese                             | -                                |
| 18                                 | Oštiepok/ Cow's Cheese                             | -                                |

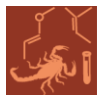

|    |                         |   |
|----|-------------------------|---|
| 19 | Baranec/Sheep Cheese    | - |
| 20 | Nite/Cow's Cheese       | - |
| 21 | Nite/Cow's Cheese       | - |
| 22 | Nite/Cow's Cheese       | - |
| 23 | Nite/Cow'S Cheese       | - |
| 24 | Korbáčik/Cow's Cheese   | - |
| 25 | Korbáčik/Cow's Cheese   | - |
| 26 | Korbáčik/Cow's Cheese   | - |
| 27 | Korbáčik/Cow's Cheese   | - |
| 28 | Sheep Cheese Not Smoked | - |
| 29 | Sheep Cheese Smoked     | - |

*Commercial Slovak cheeses:*

|    |                                               |                                                  |
|----|-----------------------------------------------|--------------------------------------------------|
| 30 | Sheep/Not Smoked/Lump                         | Ovčia Kolibka Spiš, Kluknavská Mliekárň          |
| 31 | Sheep/ Not Smoked/Lump                        | Čierny Balog                                     |
| 32 | Sheep/ Not Smoked/Lump                        | Plachtická Farma Baránek, Dolné Plachtince       |
| 33 | Sheep/ Not Smoked/Fresh                       | Plachtická Farma Baránek, Dolné Plachtince       |
| 34 | Sheep/Not Smoked/Lump                         | Kochanovce                                       |
| 35 | Sheep/Not Smoked/Lump                         | Kluknavská Mliekárň, Jaklovce                    |
| 36 | Sheep/Not Smoked/Lump                         | Kozí Vášok, Ivachnová, Liptovská Teplá           |
| 37 | Sheep/Smoked/Lump                             | Ovčia Kolibka Spiš, Kluknavská Mliekárň          |
| 38 | Sheep/Smoked/Lump                             | Agronova, Liptov, Farma Bukovina                 |
| 39 | Sheep/Smoked/Lump                             | Agronova, Liptov, Farma Bukovina                 |
| 40 | Cow/Semi-Soft, Ripening, Full-Fat/Lump        | Agrofarma, Červený Kameň                         |
| 41 | Cow/Hard, Ripening, Full-Fat, /Lump           | Agrofarma, Červený Kameň                         |
| 42 | Cow/Semi - Soft, Ripening Full - Fat/Lump     | Syráreň Bel, Michalovce                          |
| 43 | Cow/Steamed, Semi-Hard, Ripening, Semi-Fat    | Agrofarma, Červený Kameň                         |
| 44 | Cow/Steamed, Semi-Hard, Unripened, Semi-Fat   | Agrofarma, Červený Kameň                         |
| 45 | Cow/Natural, Full-Fat, Unripened, Soft        | Vážec                                            |
| 46 | Cow's Cheese                                  | -                                                |
| 47 | Cow/Fresh, Natural, Soft, Unripened, Full-Fat | Mliekárň Sky Group/Považský Inovec. Stará Lehota |
| 48 | Cow/Soft, White                               | Moja Kravička/Slatina Nad Bebravou               |
| 49 | Cow/Natural Ripening Semi - Hard, Semi - Fat  | Syrošík, Farma Východná                          |



|    |                                   |                                                   |
|----|-----------------------------------|---------------------------------------------------|
| 50 | Cow/Unripened, Full-Fat           | Mliekáreň Sky Group/Považský Inovec. Stará Lehota |
| 51 | Cow/Semi-Hard Ripening Full-Fat   | Syráreň Havran, Senica                            |
| 52 | Cow/Natural, Semi-Soft, Full-Fat  | Volovec, Milk-Agro, Prešov                        |
| 53 | Cow/Ripening, Semi-Soft, Full-Fat | Liptov, Savencia Fromage and Dairy                |
| 54 | Cow/Ripening, Semi-Soft, Full-Fat | Syráreň Bel, Michalovce                           |
| 55 | Cow/Ripening, Semi-Soft, Full-Fat | Levické Mliekárne, Levice                         |
| 56 | Cow/Ripening, Semi-Soft, Full-Fat | Koliba, Hriňová                                   |
| 57 | Cow/Ripening, Semi-Soft, Full-Fat | Levické Mliekárne, Levice                         |
| 58 | Cow/Ripening, Semi-Soft, Full-Fat | Farma Baránek, Dolné Plachtince                   |
| 59 | Cow/Ripening, Semi-Soft, Full-Fat | Nika, Považská Bystrica                           |
| 60 | Cow/Ripening, Semi-Soft, Semi-Fat | Syráreň Bel, Michalovce                           |
| 61 | Cow/Ripening, Semi-Soft, Full-Fat | Milk-Agro, Čapajevova, Prešov                     |
| 62 | Cow/Ripening, Semi-Soft, Full-Fat | Koliba, Krivec, Hriňová                           |
| 63 | Cow/Ripening, Semi-Soft, Full-Fat | Syráreň Bel, Michalovce                           |
| 64 | Cow/Ripening, Semi-Soft, Full-Fat | Liptov, Savencia Fromage and Dairy                |
| 65 | Goat/Fresh/Full-Fat               | Plachtická Farma Baránek, Dolné Plachtince        |
| 66 | Goat/Ripening/Full-Fat            | Plachtická Farma Baránek, Dolné Plachtince        |
| 67 | Goat/Ripening/Full-Fat            | Leonteus, Ivachnová, Liptovská Teplá              |
| 68 | Goat/Fresh/Full-Fat               | Syrex, Zázrivá                                    |

**\*Commercial Name/Origin of The Cheese:** 1 Plesnivec, Tami, Tatranská Mliekáreň, 2 Encián, Tami, Tatranská Mliekáreň, 3 Encián With Olives, Tami, Tatranská Mliekáreň
